# Supplementary material for: Evaluating the Dental Caries-Related Information on Brazilian Websites: Qualitative Study
Source: PubMed Central journal article supplement (PMC5745348; doi:10.2196/jmir.7681), 2017-12-13
Supplement: jmir_v19i12e415_app2.pdf [file jmir_v19i12e415_app2.pdf]

**Multimedia Appendix 2:** List of websites and respective identities, ranking, DISCERN and JAMA benchmark scores

| ID | Ranking | Webcite® links                                                                          | DISCERN | JAMA |
|----|---------|-----------------------------------------------------------------------------------------|---------|------|
|    | g       |                                                                                         | N       | A    |
| 1  | 1       | <a href="http://www.webcitation.org/6gAssu22A">http://www.webcitation.org/6gAssu22A</a> | 27      | 1    |
| 2  | 4       | <a href="http://www.webcitation.org/6gAszf6Ya">http://www.webcitation.org/6gAszf6Ya</a> | 54      | 2    |
| 3  | 5       | <a href="http://www.webcitation.org/6gAt8Th7T">http://www.webcitation.org/6gAt8Th7T</a> | 46      | 2    |
| 4  | 6       | <a href="http://www.webcitation.org/6gAt9Lrow">http://www.webcitation.org/6gAt9Lrow</a> | 22      | 0    |
| 5  | 8       | <a href="http://www.webcitation.org/6gAtAGfc5">http://www.webcitation.org/6gAtAGfc5</a> | 29      | 3    |
| 6  | 9       | <a href="http://www.webcitation.org/6gAtJtqBf">http://www.webcitation.org/6gAtJtqBf</a> | 29      | 1    |
| 7  | 10      | <a href="http://www.webcitation.org/6gAtK9Hkx">http://www.webcitation.org/6gAtK9Hkx</a> | 28      | 2    |
| 8  | 11      | <a href="http://www.webcitation.org/6gAtUCdLk">http://www.webcitation.org/6gAtUCdLk</a> | 22      | 0    |
| 9  | 12      | <a href="http://www.webcitation.org/6gAtUUbOc">http://www.webcitation.org/6gAtUUbOc</a> | 38      | 2    |
| 10 | 13      | <a href="http://www.webcitation.org/6gAtUjppS">http://www.webcitation.org/6gAtUjppS</a> | 34      | 1    |
| 11 | 15      | <a href="http://www.webcitation.org/6gAtav5BA">http://www.webcitation.org/6gAtav5BA</a> | 30      | 0    |
| 12 | 18      | <a href="http://www.webcitation.org/6gAtbErYI">http://www.webcitation.org/6gAtbErYI</a> | 43      | 3    |
| 13 | 20      | <a href="http://www.webcitation.org/6gAtojv8r">http://www.webcitation.org/6gAtojv8r</a> | 23      | 0    |
| 14 | 23      | <a href="http://www.webcitation.org/6gAtpPO6c">http://www.webcitation.org/6gAtpPO6c</a> | 43      | 2    |
| 15 | 24      | <a href="http://www.webcitation.org/6gAtpZQVN">http://www.webcitation.org/6gAtpZQVN</a> | 35      | 2    |
| 16 | 25      | <a href="http://www.webcitation.org/6gAuCOnjX">http://www.webcitation.org/6gAuCOnjX</a> | 43      | 1    |
| 17 | 26      | <a href="http://www.webcitation.org/6gAu5qlze">http://www.webcitation.org/6gAu5qlze</a> | 33      | 1    |
| 18 | 27      | <a href="http://www.webcitation.org/6gAuFvS95">http://www.webcitation.org/6gAuFvS95</a> | 35      | 2    |
| 19 | 28      | <a href="http://www.webcitation.org/6gAubHtOy">http://www.webcitation.org/6gAubHtOy</a> | 52      | 2    |
| 20 | 29      | <a href="http://www.webcitation.org/6gAubZlvp">http://www.webcitation.org/6gAubZlvp</a> | 55      | 2    |
| 21 | 30      | <a href="http://www.webcitation.org/6gAucjtlE">http://www.webcitation.org/6gAucjtlE</a> | 44      | 1    |
| 22 | 31      | <a href="http://www.webcitation.org/6gAukt1zx">http://www.webcitation.org/6gAukt1zx</a> | 53      | 2    |
| 23 | 32      | <a href="http://www.webcitation.org/6gAv4y0BP">http://www.webcitation.org/6gAv4y0BP</a> | 26      | 0    |
| 24 | 33      | <a href="http://www.webcitation.org/6gAv5uAe0">http://www.webcitation.org/6gAv5uAe0</a> | 32      | 1    |
| 25 | 34      | <a href="http://www.webcitation.org/6gAvEe4M3">http://www.webcitation.org/6gAvEe4M3</a> | 27      | 0    |
| 26 | 35      | <a href="http://www.webcitation.org/6gAvFBPGY">http://www.webcitation.org/6gAvFBPGY</a> | 33      | 1    |
| 27 | 36      | <a href="http://www.webcitation.org/6gAvPf181">http://www.webcitation.org/6gAvPf181</a> | 38      | 1    |
| 28 | 37      | <a href="http://www.webcitation.org/6gAvbJola">http://www.webcitation.org/6gAvbJola</a> | 33      | 2    |
| 29 | 38      | <a href="http://www.webcitation.org/6gAvnme4x">http://www.webcitation.org/6gAvnme4x</a> | 39      | 0    |
| 30 | 39      | <a href="http://www.webcitation.org/6gCNJxpyQ">http://www.webcitation.org/6gCNJxpyQ</a> | 35      | 1    |
| 31 | 40      | <a href="http://www.webcitation.org/6gCNUA2Zf">http://www.webcitation.org/6gCNUA2Zf</a> | 62      | 3    |
| 32 | 41      | <a href="http://www.webcitation.org/6gCNUQl1H">http://www.webcitation.org/6gCNUQl1H</a> | 43      | 2    |
|    |         | <a href="http://www.webcitation.org/6gCNYnUc">http://www.webcitation.org/6gCNYnUc</a>   |         |      |
| 33 | 42      | Q                                                                                       | 47      | 3    |
| 34 | 43      | <a href="http://www.webcitation.org/6gCNiSeRG">http://www.webcitation.org/6gCNiSeRG</a> | 24      | 0    |
| 35 | 44      | <a href="http://www.webcitation.org/6gCNlfQun">http://www.webcitation.org/6gCNlfQun</a> | 44      | 1    |
| 36 | 45      | <a href="http://www.webcitation.org/6gCNvAUE2">http://www.webcitation.org/6gCNvAUE2</a> | 46      | 2    |
| 37 | 46      | <a href="http://www.webcitation.org/6gCO37i9v">http://www.webcitation.org/6gCO37i9v</a> | 47      | 3    |
| 38 | 47      | <a href="http://www.webcitation.org/6gCO3HEtl">http://www.webcitation.org/6gCO3HEtl</a> | 42      | 2    |
|    |         | <a href="http://www.webcitation.org/6gCO3OdW">http://www.webcitation.org/6gCO3OdW</a>   |         |      |
| 39 | 48      | H                                                                                       | 26      | 0    |
| 40 | 49      | <a href="http://www.webcitation.org/6gCPyhQyD">http://www.webcitation.org/6gCPyhQyD</a> | 41      | 3    |
| 41 | 50      | <a href="http://www.webcitation.org/6gCPyrck1">http://www.webcitation.org/6gCPyrck1</a> | 35      | 2    |
| 42 | 51      | <a href="http://www.webcitation.org/6gCQ5kGPK">http://www.webcitation.org/6gCQ5kGPK</a> | 35      | 1    |
| 43 | 52      | <a href="http://www.webcitation.org/6gCQ5sJK7">http://www.webcitation.org/6gCQ5sJK7</a> | 25      | 1    |

|    |    |                                                                                         |    |   |
|----|----|-----------------------------------------------------------------------------------------|----|---|
| 44 | 53 | <a href="http://www.webcitation.org/6gCQ61Crc">http://www.webcitation.org/6gCQ61Crc</a> | 35 | 1 |
| 45 | 54 | <a href="http://www.webcitation.org/6gCQHdyA2">http://www.webcitation.org/6gCQHdyA2</a> | 21 | 0 |
|    |    | <a href="http://www.webcitation.org/6gCQKg5Q">http://www.webcitation.org/6gCQKg5Q</a>   |    |   |
| 46 | 55 | M                                                                                       | 38 | 2 |
| 47 | 56 | <a href="http://www.webcitation.org/6gCQKpFZj">http://www.webcitation.org/6gCQKpFZj</a> | 37 | 1 |
|    |    | <a href="http://www.webcitation.org/6gCQRmTF">http://www.webcitation.org/6gCQRmTF</a>   |    |   |
| 48 | 57 | Z                                                                                       | 34 | 0 |
| 49 | 58 | <a href="http://www.webcitation.org/6gCQaLGNj">http://www.webcitation.org/6gCQaLGNj</a> | 36 | 1 |
| 50 | 59 | <a href="http://www.webcitation.org/6gCQaV7BJ">http://www.webcitation.org/6gCQaV7BJ</a> | 28 | 0 |
| 51 | 60 | <a href="http://www.webcitation.org/6gCQac813">http://www.webcitation.org/6gCQac813</a> | 37 | 1 |
| 52 | 61 | <a href="http://www.webcitation.org/6gCQt800K">http://www.webcitation.org/6gCQt800K</a> | 39 | 0 |
| 53 | 62 | <a href="http://www.webcitation.org/6gCQtDHzZ">http://www.webcitation.org/6gCQtDHzZ</a> | 22 | 1 |
| 54 | 63 | <a href="http://www.webcitation.org/6gCQtKyoa">http://www.webcitation.org/6gCQtKyoa</a> | 34 | 1 |
| 55 | 64 | <a href="http://www.webcitation.org/6gCR3KMa1">http://www.webcitation.org/6gCR3KMa1</a> | 19 | 2 |
| 56 | 65 | <a href="http://www.webcitation.org/6gCRLFpG6">http://www.webcitation.org/6gCRLFpG6</a> | 22 | 0 |
| 57 | 66 | <a href="http://www.webcitation.org/6gCRLMPz3">http://www.webcitation.org/6gCRLMPz3</a> | 29 | 1 |
| 58 | 67 | <a href="http://www.webcitation.org/6gCRXzWtD">http://www.webcitation.org/6gCRXzWtD</a> | 32 | 2 |
| 59 | 68 | <a href="http://www.webcitation.org/6gCRY6VUk">http://www.webcitation.org/6gCRY6VUk</a> | 29 | 0 |
| 60 | 69 | <a href="http://www.webcitation.org/6gCRfqghB">http://www.webcitation.org/6gCRfqghB</a> | 28 | 0 |
|    |    | <a href="http://www.webcitation.org/6gCRYWA6">http://www.webcitation.org/6gCRYWA6</a>   |    |   |
| 61 | 70 | g                                                                                       | 19 | 0 |
| 62 | 71 | <a href="http://www.webcitation.org/6gCRfyE1x">http://www.webcitation.org/6gCRfyE1x</a> | 40 | 1 |
| 63 | 72 | <a href="http://www.webcitation.org/6gCRLar4K">http://www.webcitation.org/6gCRLar4K</a> | 31 | 1 |
| 64 | 73 | <a href="http://www.webcitation.org/6gCRy27Ro">http://www.webcitation.org/6gCRy27Ro</a> | 29 | 0 |
| 65 | 74 | <a href="http://www.webcitation.org/6gCRyCLjT">http://www.webcitation.org/6gCRyCLjT</a> | 27 | 0 |
| 66 | 75 | <a href="http://www.webcitation.org/6gCS4jqA6">http://www.webcitation.org/6gCS4jqA6</a> | 28 | 0 |
| 67 | 21 | <a href="http://www.webcitation.org/6hGaF3NKE">http://www.webcitation.org/6hGaF3NKE</a> | 45 | 0 |
|    |    | <a href="http://www.webcitation.org/6hGbGKOK">http://www.webcitation.org/6hGbGKOK</a>   |    |   |
| 68 | 2  | 4                                                                                       | 52 | 0 |
| 69 | 3  | <a href="http://www.webcitation.org/6hGbJu0jN">http://www.webcitation.org/6hGbJu0jN</a> | 64 | 3 |
| 70 | 7  | <a href="http://www.webcitation.org/6hGbTSraL">http://www.webcitation.org/6hGbTSraL</a> | 39 | 2 |
| 71 | 14 | <a href="http://www.webcitation.org/6hGbxGKvz">http://www.webcitation.org/6hGbxGKvz</a> | 41 | 1 |
| 72 | 16 | <a href="http://www.webcitation.org/6hGc0ogdT">http://www.webcitation.org/6hGc0ogdT</a> | 45 | 1 |
|    |    | <a href="http://www.webcitation.org/6hGcCMSL">http://www.webcitation.org/6hGcCMSL</a>   |    |   |
| 73 | 19 | W                                                                                       | 30 | 0 |
| 74 | 22 | <a href="http://www.webcitation.org/6hGcL60Ya">http://www.webcitation.org/6hGcL60Ya</a> | 31 | 0 |
| 75 | 17 | <a href="http://www.webcitation.org/6hGXUeroU">http://www.webcitation.org/6hGXUeroU</a> | 37 | 1 |
