# Supplementary material for: Evaluating the Dental Caries-Related Information on Brazilian Websites: Qualitative Study
Source: J Med Internet Res. 2017 Dec 13;19(12):e415. doi: 10.2196/jmir.7681 (PMC5745348; doi:10.2196/jmir.7681)
Supplement: Multimedia Appendix 1 [file jmir_v19i12e415_app1.pdf]

## Appendices

**Multimedia Appendix 1:** List of 56 dental caries-related keywords retrieved in *Google Search* and *Keyword Planner* (written in Brazilian Portuguese)

|                       |                      |                            |
|-----------------------|----------------------|----------------------------|
| Cárie dentária        | Carie                | Cárie sintomas             |
| Cárie dentaria        | Cárie no dente       | Causa cárie                |
| Dentes cariados       | Cárie no dente       | Causa carie                |
| Cárie sintomas        | Cárie de dente       | Prevenção de cárie         |
| Cárie sintomas        | Cárie de dente       | Prevenção de carie         |
| Cárie de mamadeira    | Dente com cárie      | Cárie tratamento           |
| Cárie de mamadeira    | Dente com carie      | Cárie tratamento           |
| Dente cariado         | Cárie dente          | Tratar cárie               |
| Cárie em dente        | Cárie dente          | Tratar carie               |
| Cárie em dente        | Cárie dente de leite | Cárie profunda             |
| Cárie dental          | Cárie dente de leite | Cárie profunda             |
| Cárie dental          | Lesão cariada        | Tirar cárie                |
| Cárie                 | Cárie sintomas       | Tirar carie                |
| Ponto preto no dente  | Detecção de carie    | Dente estragado            |
| Buraco no dente       | Furo no dente        | Cáries em crianças         |
| Dente furado          | Cáries na infância   | Cáries precoce da infância |
| Mancha preta no dente | Dente podre          | Mancha branca nos dentes   |
| Bicho no dente        | Furinho no dente     |                            |
| Dente com cárie       | Cáries do biberão    |                            |
